# Supplementary material for: Delivery of mitochondria confers cardioprotection through mitochondria replenishment and metabolic compliance
Source: PubMed Central journal article supplement — Mol Ther. 2023 Feb 18;31(5):1468–79. doi: 10.1016/j.ymthe.2023.02.016 (PMC10188643; doi:10.1016/j.ymthe.2023.02.016), 2023-02-18
Supplement: mmc1.pdf [file mmc1.pdf]

**YMTHE, Volume 31**

## **Supplemental Information**

**Delivery of mitochondria confers  
cardioprotection through mitochondria  
replenishment and metabolic compliance**

**Alian Zhang, Yangyang Liu, Jianan Pan, Francesca Pontanari, Andrew Chia-Hao Chang, Honghui Wang, Shuang Gao, Changqian Wang, and Alex CY. Chang**

**Table S1. GO analysis of 804 atrial and 1192 ventricular mitochondrial transplantation perturbed genes.**

**Table S2. RT-qPCR primers used.**

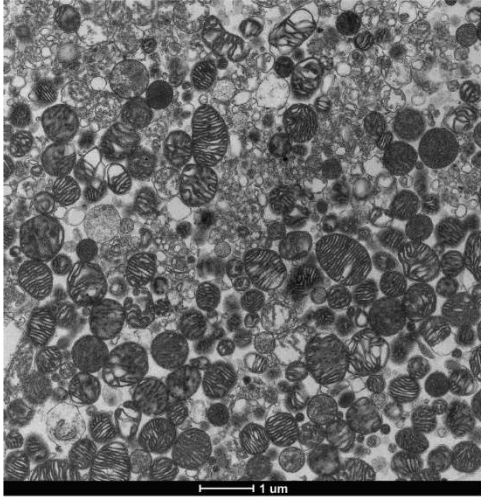

**Modified** Preble *et al.*  
J. Vis. Exp. 2014

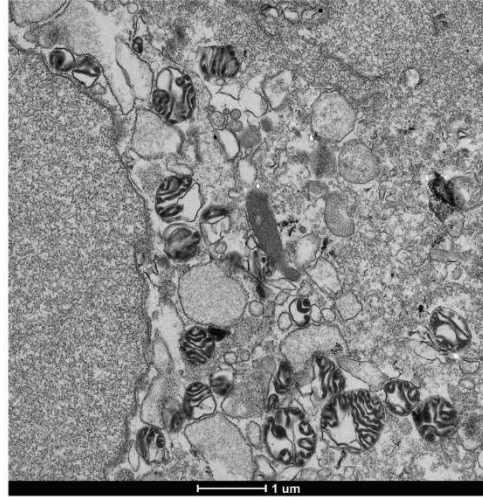

Frezza *et al.*  
Nature Protocols 2007

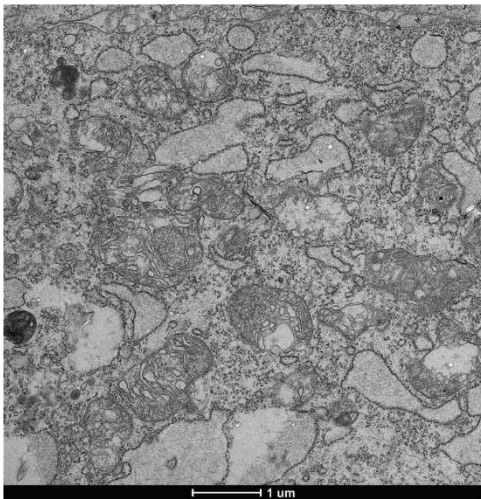

Thermo Mitochondrial  
Isolation Kit (Cat. No. 89874)

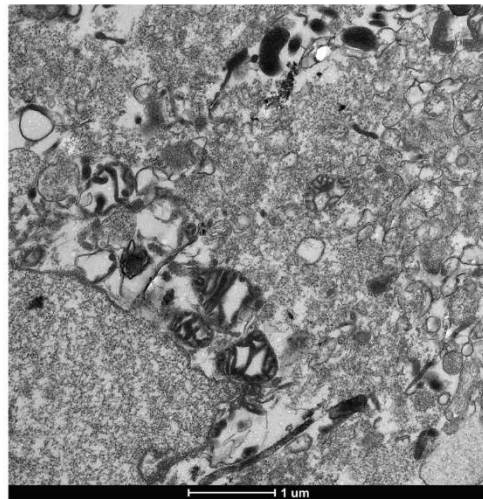

Wieckowski *et al.*  
Nature Protocols 2009

**Figure S1. Evaluation of mitochondria ultrastructure by transmission electron microscopy.**

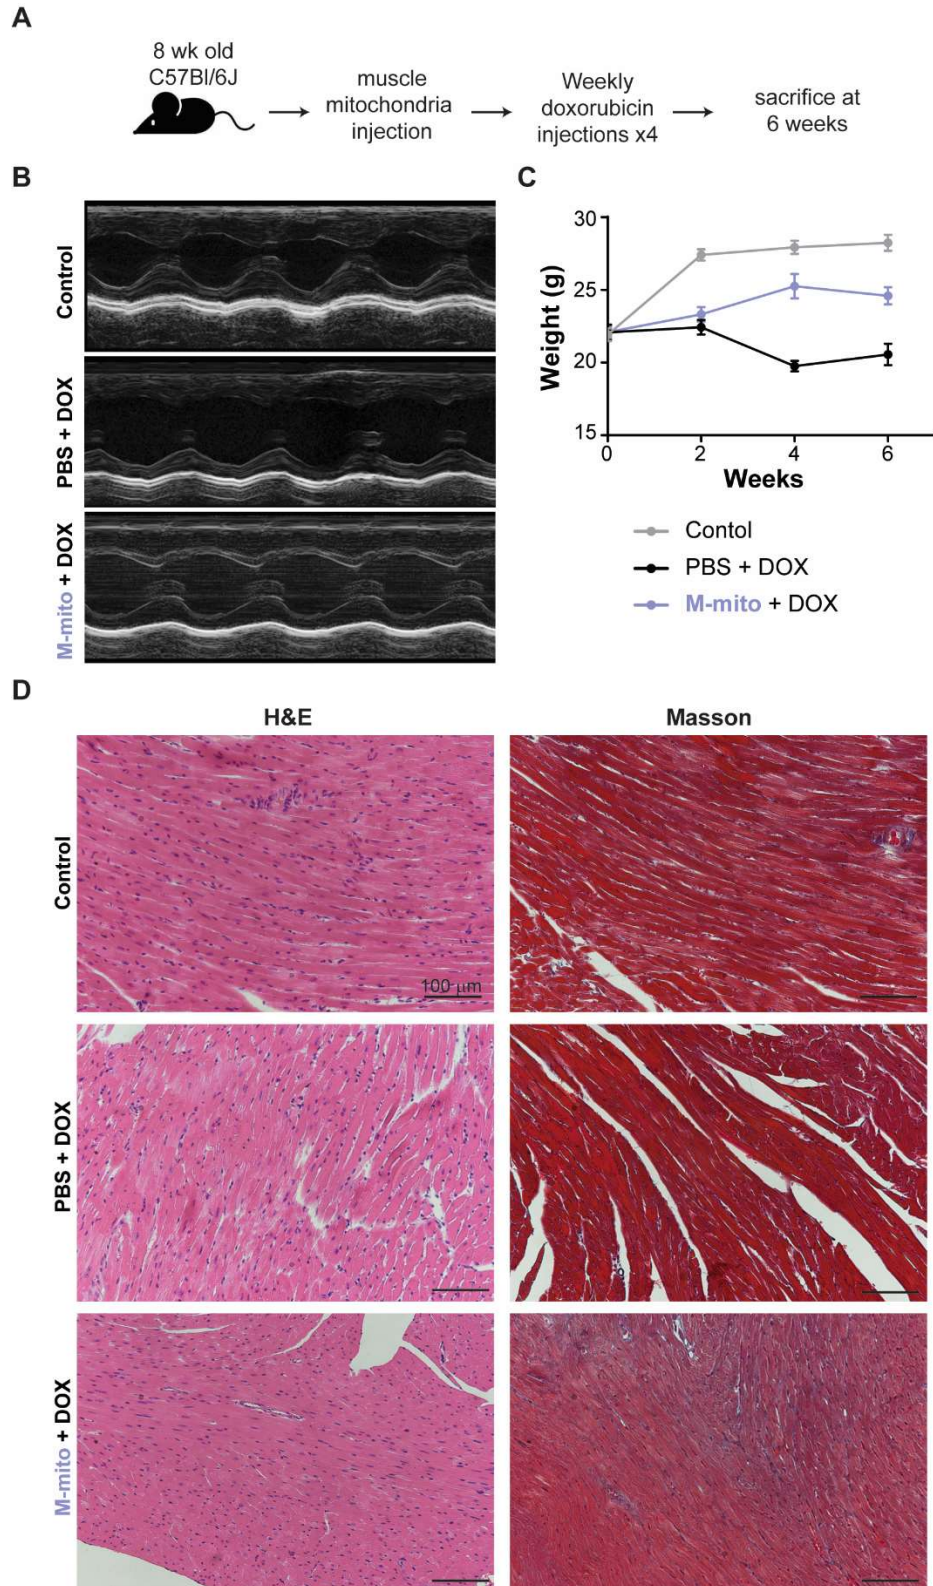

**Figure S2. Doxorubicin heart failure model.** (A) Schematic of doxorubicin heart failure mouse model. (B) Representative left ventricular M-mode echocardiographic and pulsed-wave Doppler tracings. (C) Animal weight during doxorubicin challenge (N = 6 animals per group). Data are shown as mean  $\pm$  SEM. (D) Representative images of H&E and Masson staining.

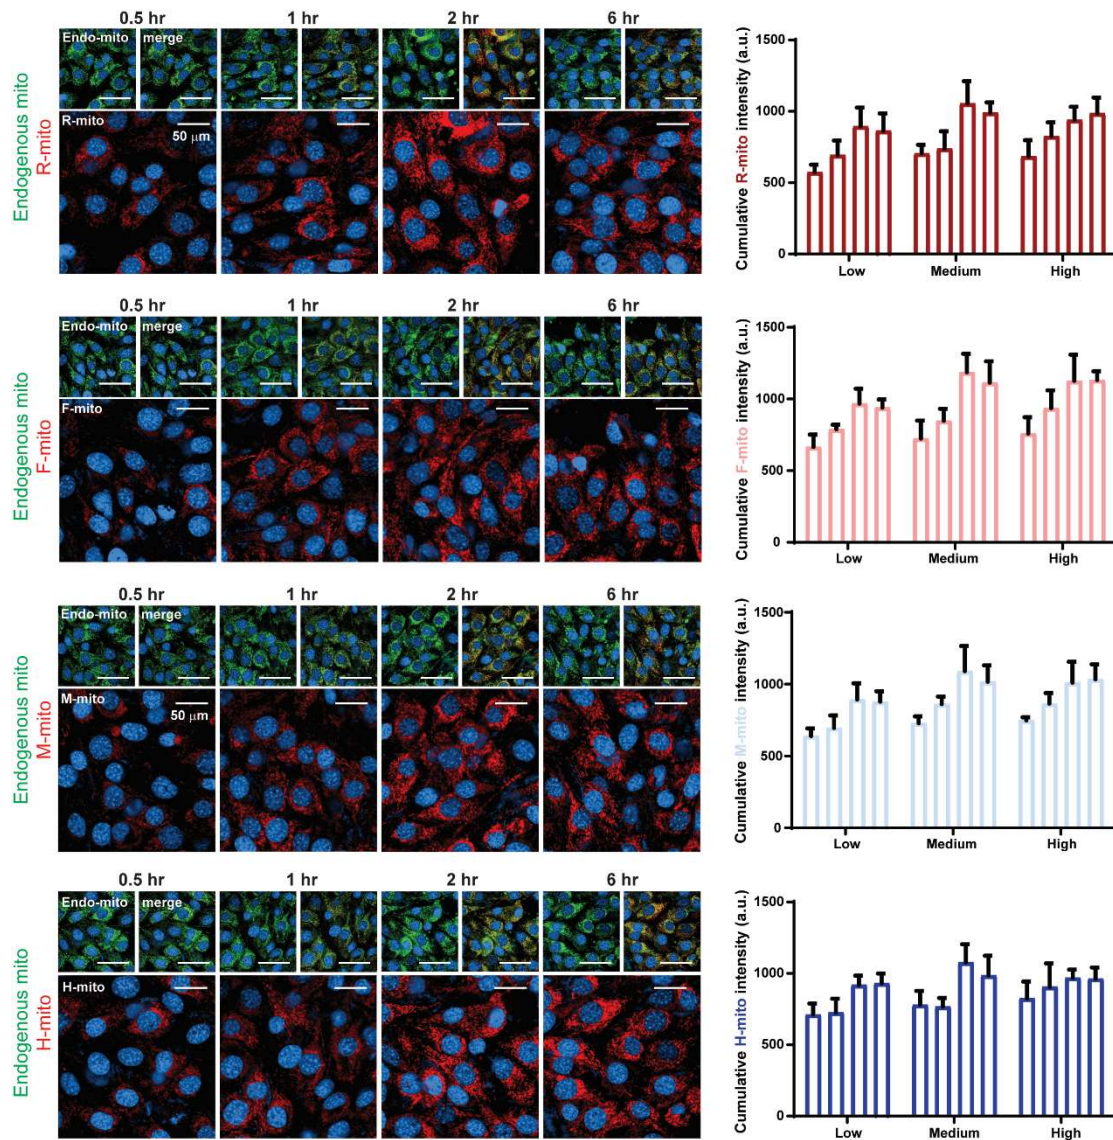

**Figure S3.** Mitochondria absorption kinetics of neonatal murine ventricular cardiomyocytes. Representative cardiomyocyte micrographs are shown. Cumulative R-mito, F-mito, M-mito and H-mito signals at 0.5h, 1h, 2h, and 6h are shown (N = 20-25 neonatal hearts were pooled for NMVM isolation; n = 3). Three mitochondrial concentrations were tested (low:  $0.5 \times 10^4/100\mu\text{L}$ ; medium:  $1.0 \times 10^4/100\mu\text{L}$ ; high:  $2.0 \times 10^4/100\mu\text{L}$ ). Data are shown as mean  $\pm$  SEM.

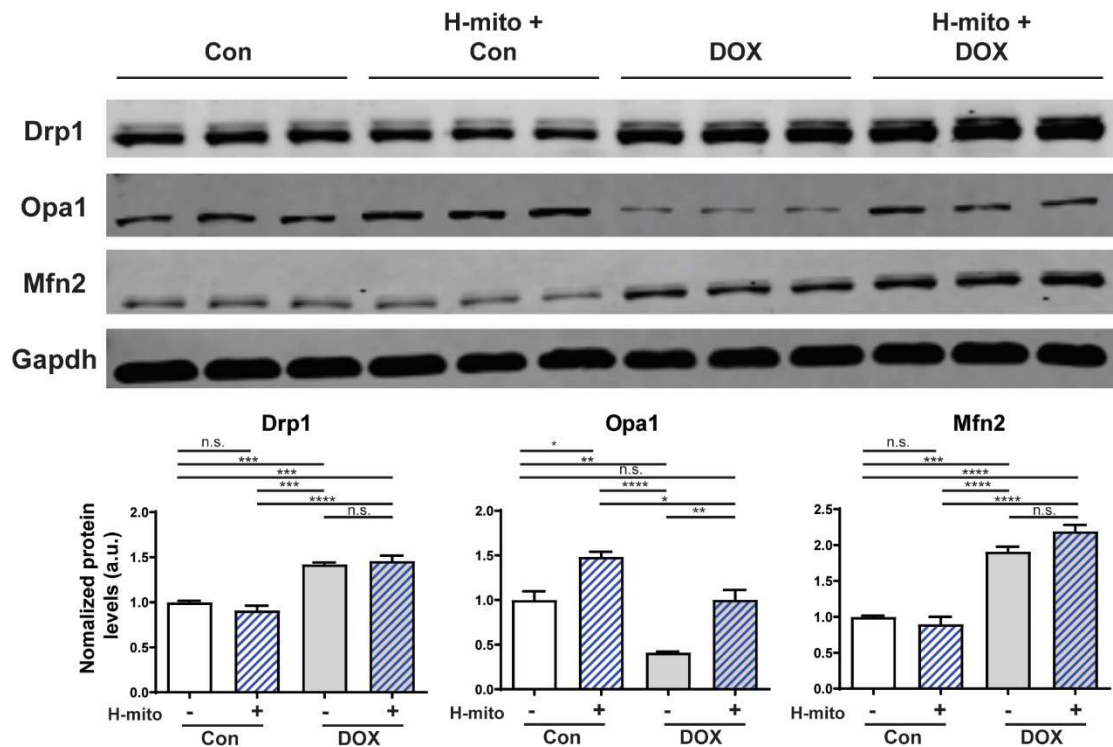

**Figure S4. Mitochondria transplantation and doxorubicin treatment alters mitochondrial homeostasis.** Cardiomyocytes isolated from animals treated with or without H-mito and challenged with or without doxorubicin were immunoblotted for mitofusion Opa1 and Mfn2 and mitofission Drp1 protein (N = 3 animals each). Gapdh expression was used as loading control and quantifications are shown. Data are shown as mean  $\pm$  SEM. Significance was determined by one-way ANOVA. \*P<0.05, \*\*P<0.01, \*\*\*P<0.001, \*\*\*\*P<0.0001.

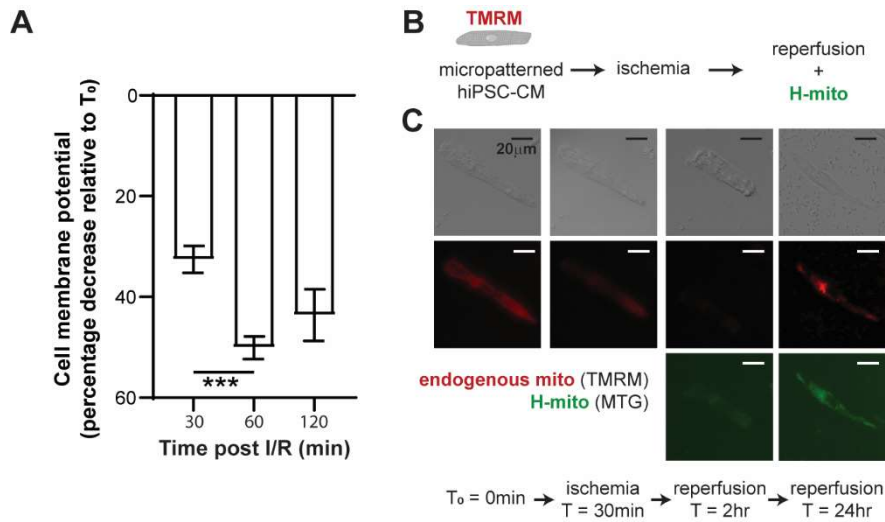

**Figure S5. Evaluation of mitochondrial membrane potential during ischemia reperfusion.** (A) Ischemic reperfusion challenge in healthy hiPSC-CMs results in loss of mitochondrial membrane potential ( $n = 15\text{-}37$  cells). Data are shown as mean  $\pm$  SEM. Significance was determined by one-way ANOVA for the remaining panels.  $***P < 0.001$ . (B-C) Live cell microscopy demonstrating restoration of mitochondrial membrane potential in cardiomyocytes challenged by ischemia reperfusion by transplanting mitochondria isolated from healthy hiPSC-CMs.

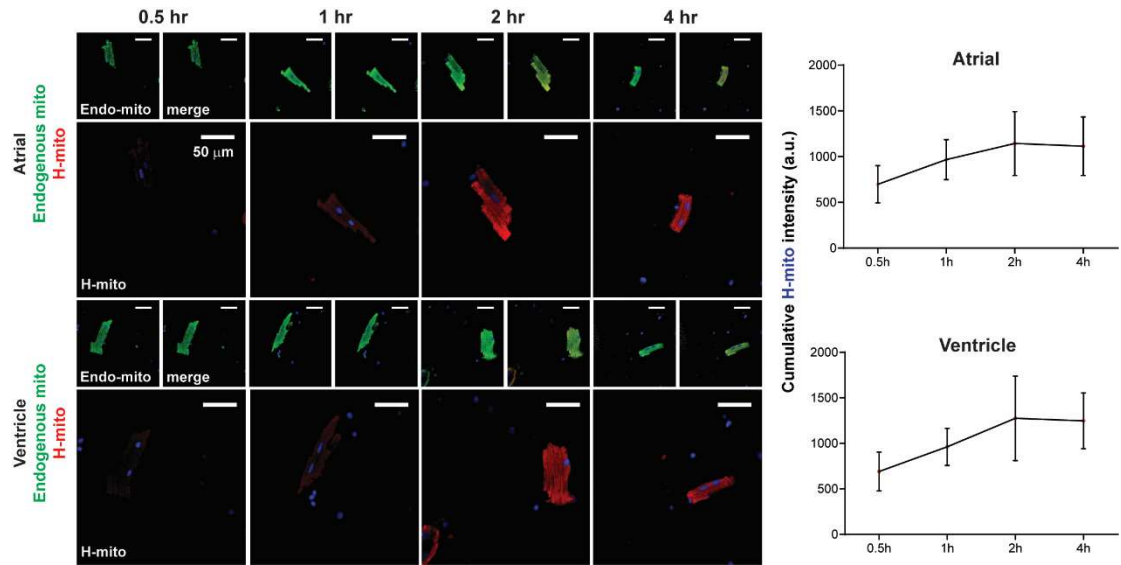

**Figure S6. Mitochondria absorption kinetics of Langendorff purified atrial and ventricular murine cardiomyocytes.** Representative atrial and ventricular cardiomyocyte micrographs are shown. Cumulative H-mito signal over time are shown (N = 3 animals each). Data are shown as mean  $\pm$  SEM.
